# Supplementary material for: Effects of Dietary Ochratoxin A on Growth Performance and Intestinal Apical Junctional Complex of Juvenile Grass Carp (Ctenopharyngodon idella)
Source: PubMed Central journal article supplement (PMC7823973; doi:10.3390/toxins13010011), 2020-12-24
Supplement: toxins-13-00011-s001.pdf [file toxins-13-00011-s001.pdf]

# Supplementary Materials: Effects of Dietary Ochratoxin A on Growth Performance and Intestinal Apical Junctional Complex of Juvenile Grass Carp (*Ctenopharyngodon idella*)

Xin Liu, Pei Wu, Wei-Dan Jiang, Yang Liu, Jun Jiang, Sheng-Yao Kuang, Ling Tang, Xiao-Qiu Zhou and Lin Feng

Table S1. Correlation analysis of parameters in the intestine of juvenile grass carp.

| Independent Parameters | Dependent Parameters | PI                       |        | MI                       |        | DI                       |       |
|------------------------|----------------------|--------------------------|--------|--------------------------|--------|--------------------------|-------|
|                        |                      | Correlation Coefficients | P      | Correlation Coefficients | P      | Correlation Coefficients | P     |
| RhoA                   | ZO <sup>1</sup> -1   | -0.913                   | <0.01  | -0.982                   | <0.01  | -0.965                   | <0.01 |
|                        | ZO <sup>1</sup> -2b  | -0.982                   | <0.01  | -                        | -      | -                        | -     |
|                        | occludin             | -0.970                   | <0.01  | -0.968                   | <0.01  | -0.972                   | <0.01 |
|                        | claudin-b            | -                        | -      | -                        | -      | -                        | -     |
|                        | claudin-c            | -0.922                   | <0.01  | -0.971                   | <0.01  | -0.993                   | <0.01 |
|                        | claudin-f            | -0.931                   | <0.01  | -0.962                   | <0.01  | -0.984                   | <0.01 |
|                        | claudin-3c           | -                        | -      | -0.961                   | <0.01  | -0.995                   | <0.01 |
|                        | claudin-7a           | -0.987                   | <0.01  | -0.971                   | <0.01  | -0.955                   | <0.01 |
|                        | claudin-7b           | -0.896                   | <0.01  | -0.987                   | <0.01  | -0.959                   | <0.01 |
|                        | claudin-11           | -0.981                   | <0.01  | -0.973                   | <0.01  | -0.988                   | <0.01 |
|                        | claudin-12           | 0.906                    | <0.01  | 0.983                    | <0.01  | 0.932                    | <0.01 |
|                        | claudin-15a          | -0.909                   | <0.01  | -0.974                   | <0.01  | -0.993                   | <0.01 |
|                        | claudin-15b          | 0.916                    | <0.01  | -0.976                   | <0.01  | -0.995                   | <0.01 |
|                        | JAM <sup>2</sup> -A  | -0.983                   | <0.01  | -0.956                   | <0.01  | -0.980                   | <0.01 |
|                        | E-cadherin           | -0.968                   | <0.01  | -0.970                   | <0.01  | -0.941                   | <0.01 |
|                        | $\alpha$ -catenin    | -0.953                   | <0.01  | -0.942                   | <0.01  | -0.993                   | <0.01 |
|                        | $\beta$ -catenin     | -0.921                   | <0.01  | -0.953                   | <0.01  | -0.973                   | <0.01 |
| nectin                 | -0.990               | <0.01                    | -0.975 | <0.01                    | 0.990  | <0.01                    |       |
| afadin                 | -0.968               | <0.01                    | -0.993 | <0.01                    | -0.988 | <0.01                    |       |
| RhoA protein level     | ZO <sup>1</sup> -1   | -0.938                   | <0.01  | -0.969                   | <0.01  | -0.776                   | <0.05 |
|                        | ZO <sup>1</sup> -2b  | -0.884                   | <0.01  | -                        | -      | -                        | -     |
|                        | occludin             | -0.875                   | <0.01  | -0.965                   | <0.01  | -0.840                   | <0.05 |
|                        | claudin-b            | -                        | -      | -                        | -      | -                        | -     |
|                        | claudin-c            | -0.919                   | <0.01  | -0.967                   | <0.01  | -0.878                   | <0.01 |
|                        | claudin-f            | -0.899                   | <0.01  | -0.951                   | <0.01  | -0.921                   | <0.01 |
|                        | claudin-3c           | -                        | -      | -0.975                   | <0.01  | -0.880                   | <0.01 |
|                        | claudin-7a           | -0.876                   | <0.01  | -0.965                   | <0.01  | -0.955                   | <0.01 |
|                        | claudin-7b           | -0.965                   | <0.01  | -0.987                   | <0.01  | -0.833                   | <0.05 |
|                        | claudin-11           | -0.867                   | <0.05  | -0.938                   | <0.01  | -0.896                   | <0.01 |
|                        | claudin-12           | 0.901                    | <0.01  | 0.963                    | <0.01  | 0.957                    | <0.01 |
|                        | claudin-15a          | -0.983                   | <0.01  | -0.993                   | <0.01  | -0.922                   | <0.01 |
|                        | claudin-15b          | -0.924                   | <0.01  | -0.909                   | <0.01  | -0.907                   | <0.01 |
|                        | JAM <sup>2</sup> -A  | -0.846                   | <0.05  | -0.964                   | <0.01  | -0.830                   | <0.05 |
|                        | E-cadherin           | -0.936                   | <0.01  | -0.948                   | <0.01  | -0.773                   | <0.05 |
|                        | $\alpha$ -catenin    | -0.925                   | <0.01  | -0.963                   | <0.01  | -0.902                   | <0.01 |
|                        | $\beta$ -catenin     | -0.923                   | <0.01  | -0.966                   | <0.01  | -0.967                   | <0.01 |
| nectin                 | -0.872               | <0.05                    | -0.970 | <0.01                    | -0.879 | <0.01                    |       |
| afadin                 | -0.936               | <0.01                    | -0.968 | <0.01                    | -0.903 | <0.01                    |       |
| ROCK                   | ZO <sup>1</sup> -1   | -0.945                   | <0.01  | -0.946                   | <0.01  | -0.987                   | <0.01 |
|                        | ZO <sup>1</sup> -2b  | -0.990                   | <0.01  | -                        | -      | -                        | -     |
|                        | occludin             | -0.993                   | <0.01  | -0.933                   | <0.01  | -0.980                   | <0.01 |
|                        | claudin-b            | -                        | -      | -                        | -      | -                        | -     |

|      |                     |        |       |        |       |        |       |
|------|---------------------|--------|-------|--------|-------|--------|-------|
|      | claudin-c           | -0.953 | <0.01 | -0.933 | <0.01 | -0.988 | <0.01 |
|      | claudin-f           | -0.961 | <0.01 | -0.909 | <0.01 | -0.933 | <0.01 |
|      | claudin-3c          | -      | -     | -0.928 | <0.01 | -0.968 | <0.01 |
|      | claudin-7a          | -0.980 | <0.01 | -0.922 | <0.01 | -0.892 | <0.01 |
|      | claudin-7b          | -0.934 | <0.01 | -0.962 | <0.01 | -0.968 | <0.01 |
|      | claudin-11          | -0.968 | <0.01 | -0.927 | <0.01 | -0.950 | <0.01 |
|      | claudin-12          | 0.931  | <0.01 | 0.943  | <0.01 | 0.880  | <0.01 |
|      | claudin-15a         | -0.933 | <0.01 | -0.939 | <0.01 | -0.947 | <0.01 |
|      | claudin-15b         | -0.934 | <0.01 | -0.939 | <0.01 | -0.968 | <0.01 |
|      | JAM <sup>2</sup> -A | -0.989 | <0.01 | -0.928 | <0.01 | -0.989 | <0.01 |
|      | E-cadherin          | -0.977 | <0.01 | -0.925 | <0.01 | -0.954 | <0.01 |
|      | $\alpha$ -catenin   | -0.981 | <0.01 | -0.927 | <0.01 | -0.974 | <0.01 |
|      | $\beta$ -catenin    | -0.942 | <0.01 | -0.920 | <0.01 | -0.914 | <0.01 |
|      | nectin              | -0.995 | <0.01 | -0.946 | <0.01 | -0.962 | <0.01 |
|      | afadin              | -0.977 | <0.01 | -0.961 | <0.01 | -0.949 | <0.01 |
|      | ZO <sup>1</sup> -1  | -0.981 | <0.01 | -0.995 | <0.01 | -0.972 | <0.01 |
|      | ZO <sup>1</sup> -2b | -0.934 | <0.01 | -      | -     | -      | -     |
|      | occludin            | -0.932 | <0.01 | -0.948 | <0.01 | -0.969 | <0.01 |
|      | claudin-b           | -      | -     | -      | -     | -      | -     |
|      | claudin-c           | -0.963 | <0.01 | -0.941 | <0.01 | -0.990 | <0.01 |
|      | claudin-f           | -0.953 | <0.01 | -0.944 | <0.01 | -0.981 | <0.01 |
|      | claudin-3c          | -      | -     | -0.934 | <0.01 | -0.998 | <0.01 |
|      | claudin-7a          | -0.915 | <0.01 | -0.952 | <0.01 | -0.947 | <0.01 |
|      | claudin-7b          | -0.996 | <0.01 | -0.968 | <0.01 | -0.951 | <0.01 |
| MLCK | claudin-11          | -0.903 | <0.01 | -0.969 | <0.01 | -0.985 | <0.01 |
|      | claudin-12          | 0.954  | <0.01 | 0.998  | <0.01 | 0.918  | <0.01 |
|      | claudin-15a         | -0.936 | <0.01 | -0.968 | <0.01 | -0.990 | <0.01 |
|      | claudin-15b         | -0.966 | <0.01 | -0.979 | <0.01 | -0.993 | <0.01 |
|      | JAM <sup>2</sup> -A | -0.899 | <0.01 | -0.955 | <0.01 | 0.984  | <0.01 |
|      | $\alpha$ -catenin   | -0.970 | <0.01 | -0.887 | <0.01 | -0.987 | <0.01 |
|      | $\beta$ -catenin    | -0.961 | <0.01 | -0.960 | <0.01 | -0.948 | <0.01 |
|      | E-cadherin          | -0.929 | <0.01 | -0.974 | <0.01 | -0.939 | <0.01 |
|      | afadin              | -0.929 | <0.01 | -0.982 | <0.01 | -0.976 | <0.01 |
|      | nectin              | -0.916 | <0.01 | -0.981 | <0.01 | -0.983 | <0.01 |
|      | ZO <sup>1</sup> -1  | -0.966 | <0.01 | -0.981 | <0.01 | -0.976 | <0.01 |
|      | ZO <sup>1</sup> -2b | -0.953 | <0.01 | -      | -     | -      | -     |
|      | occludin            | -0.937 | <0.01 | -0.924 | <0.01 | -0.974 | <0.01 |
|      | claudin-b           | -      | -     | -      | -     | -      | -     |
|      | claudin-c           | -0.951 | <0.01 | -0.923 | <0.01 | -0.988 | <0.01 |
|      | claudin-f           | -0.944 | <0.01 | -0.930 | <0.01 | -0.929 | <0.01 |
|      | claudin-3c          | -      | -     | -0.906 | <0.01 | -0.962 | <0.01 |
|      | claudin-7a          | -0.952 | <0.01 | -0.938 | <0.01 | -0.894 | <0.01 |
|      | claudin-7b          | -0.976 | <0.01 | -0.950 | <0.01 | 0.965  | <0.01 |
| NMII | claudin-11          | -0.946 | <0.01 | -0.956 | <0.01 | 0.945  | <0.01 |
|      | claudin-12          | 0.948  | <0.01 | 0.983  | <0.01 | 0.887  | <0.01 |
|      | claudin-15a         | -0.927 | <0.01 | -0.946 | <0.01 | -0.946 | <0.01 |
|      | claudin-15b         | -0.965 | <0.01 | -0.988 | <0.01 | -0.969 | <0.01 |
|      | JAM <sup>2</sup> -A | -0.922 | <0.01 | -0.946 | <0.01 | -0.981 | <0.01 |
|      | E-cadherin          | -0.955 | <0.01 | -0.978 | <0.01 | -0.946 | <0.01 |
|      | $\alpha$ -catenin   | -0.968 | <0.01 | -0.866 | <0.01 | -0.974 | <0.01 |
|      | $\beta$ -catenin    | -0.958 | <0.01 | -0.946 | <0.01 | -0.929 | <0.01 |
|      | nectin              | -0.940 | <0.01 | -0.970 | <0.01 | -0.962 | <0.01 |
|      | afadin              | -0.955 | <0.01 | -0.983 | <0.01 | -0.959 | <0.01 |

<sup>1</sup> ZO, zonula occluden. <sup>2</sup> JAM, junctional adhesion molecule.
